# Supplementary material for: The adipokinetic hormones and their cognate receptor from the desert locust, Schistocerca gregaria : solution structure of endogenous peptides and models of their binding to the receptor
Source: PeerJ journal article supplement (doi:10.7717/peerj.7514), 2019-08-30
Supplement: Suplimentary_figures.pdf [file Suplimentary_figures.pdf]

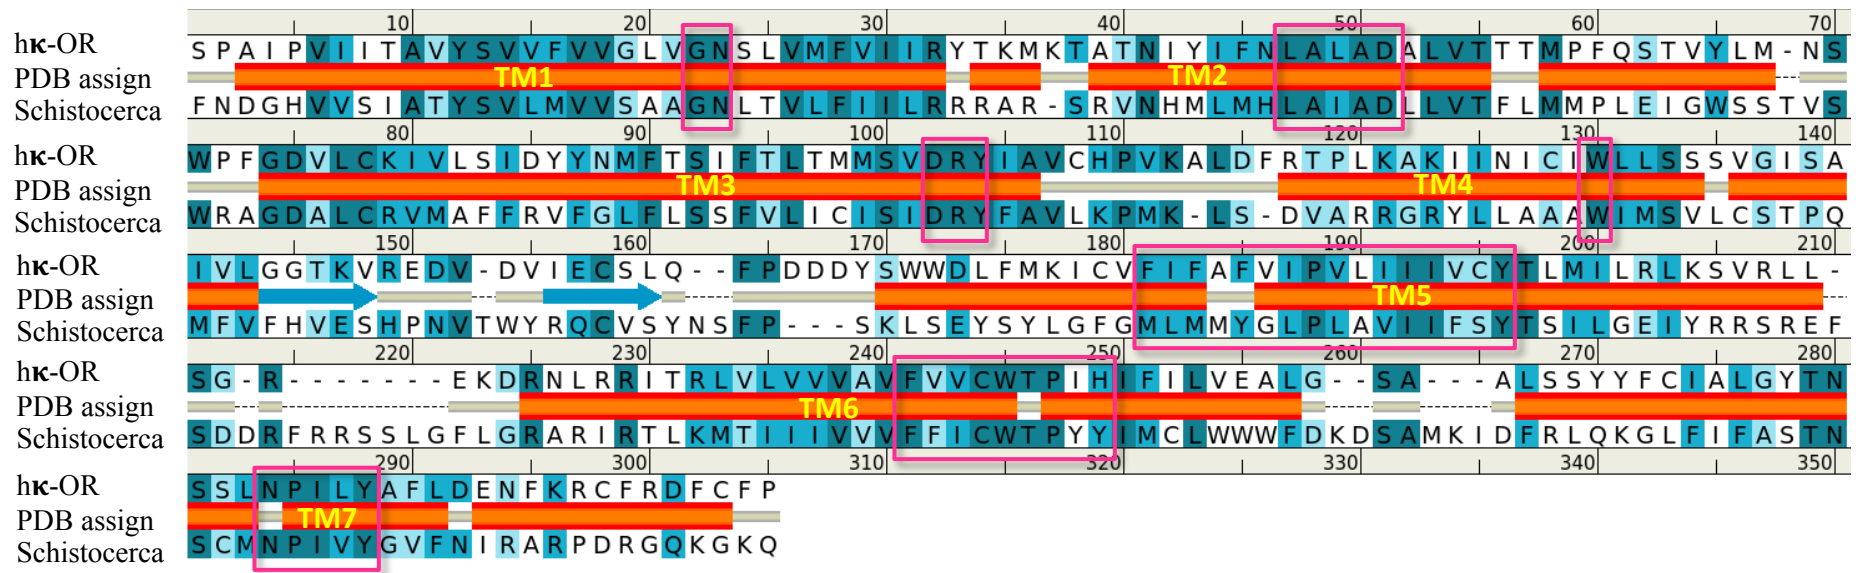

**Figure S1** Sequence alignment of *Schistocerca gregaria* receptor with the crystal structures of hκ-OR (PDB ID: 4DJH). Coloring scheme indicates the degree of similarity at each alignment column. Identical (strong blue background), strongly similar (light blue background), weakly similar (very light blue background) and non-matching residues (white background) are highlighted. Experimentally determined secondary structures for hκ-OR are shown in cartoon are color coded, with helices in red, strands in blue, and coils in beige. The seven transmembrane helices (TM1-TM7) are highlighted and highly conserved residues among Class A GPCRs in hκ-OR and purple are represented in green colored boxes.

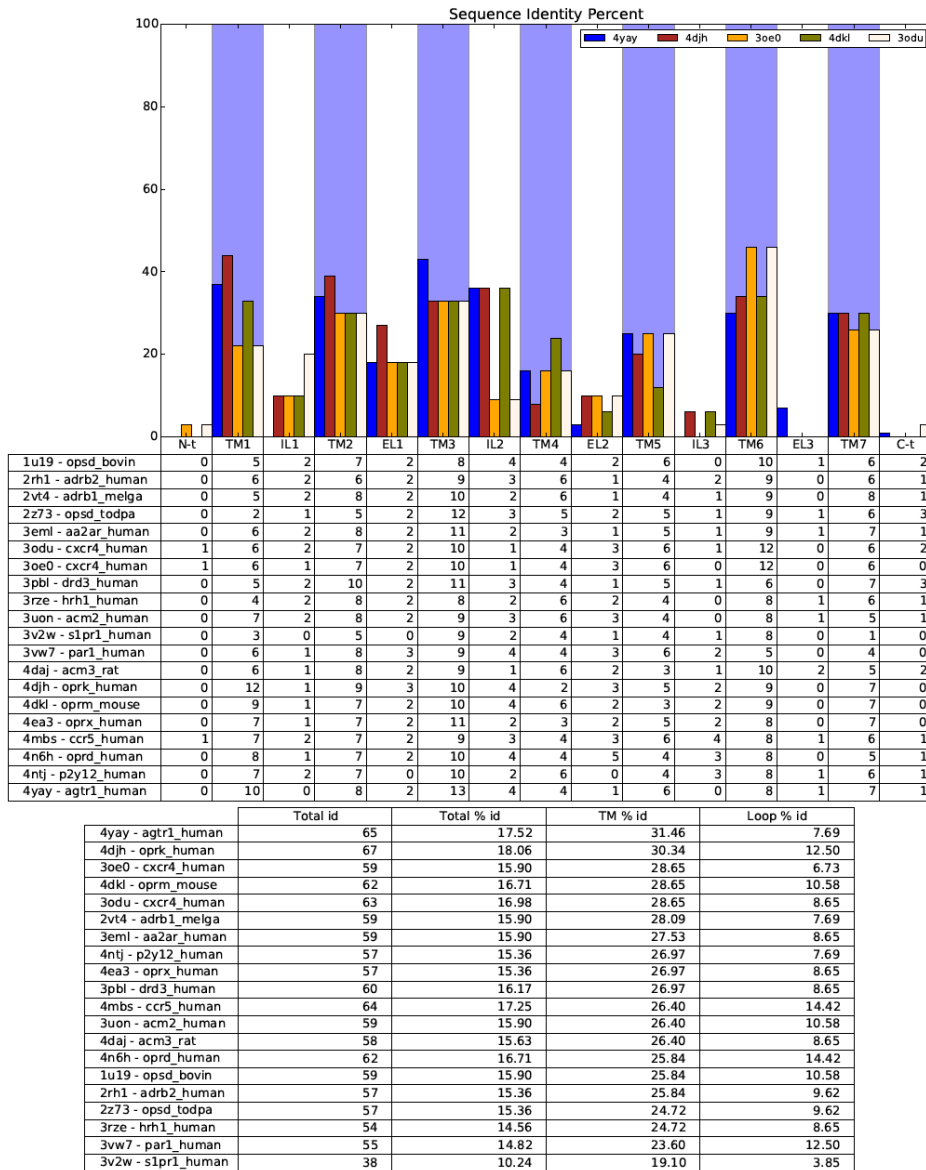

Figure S2 GPCR-ModSim server sequence identity match

## MEMSAT-SVM Cartoon

fa724d11-c928-4a24-be1a-7d39ea9a9565.seq.job

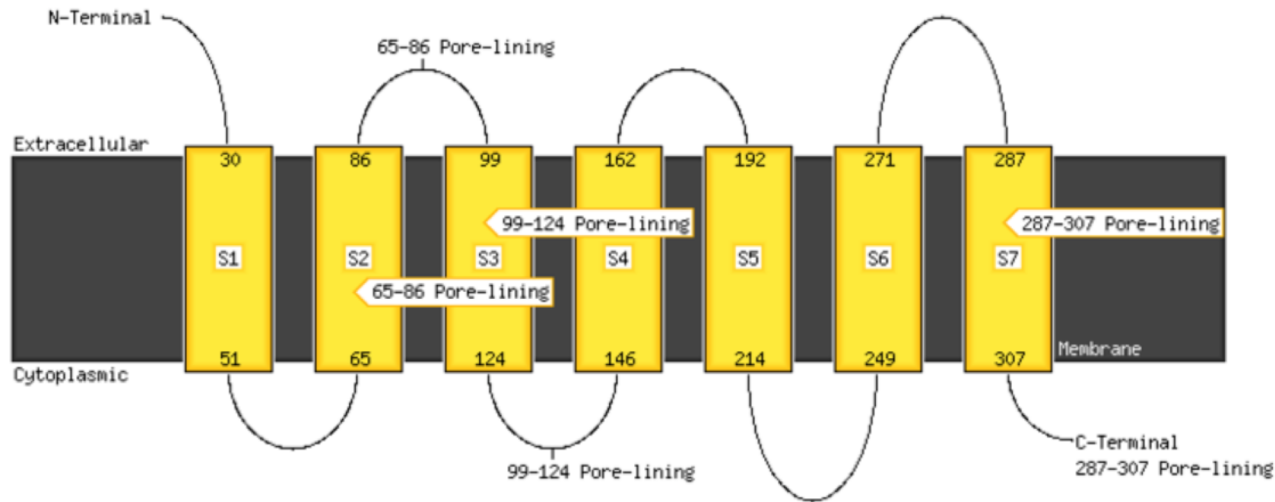

## MEMSAT-SVM Prediction

### Summary of MEMSAT-SVM Topology Analysis

|                     |                                                    |
|---------------------|----------------------------------------------------|
| Signal peptide      | Not detected.                                      |
| Signal score        | 0                                                  |
| Topology            | 30-51,65-86,99-124,146-162,192-214,249-271,287-307 |
| Re-entrant helices  | Not detected.                                      |
| Pore-lining helices | 65-86,99-124,287-307                               |
| Helix count         | 7                                                  |
| N-terminal          | out                                                |
| Score               | 10.9748                                            |
| Pore stoichiometry  | 1                                                  |

Figure S3. Prediction of transmembrane helices.

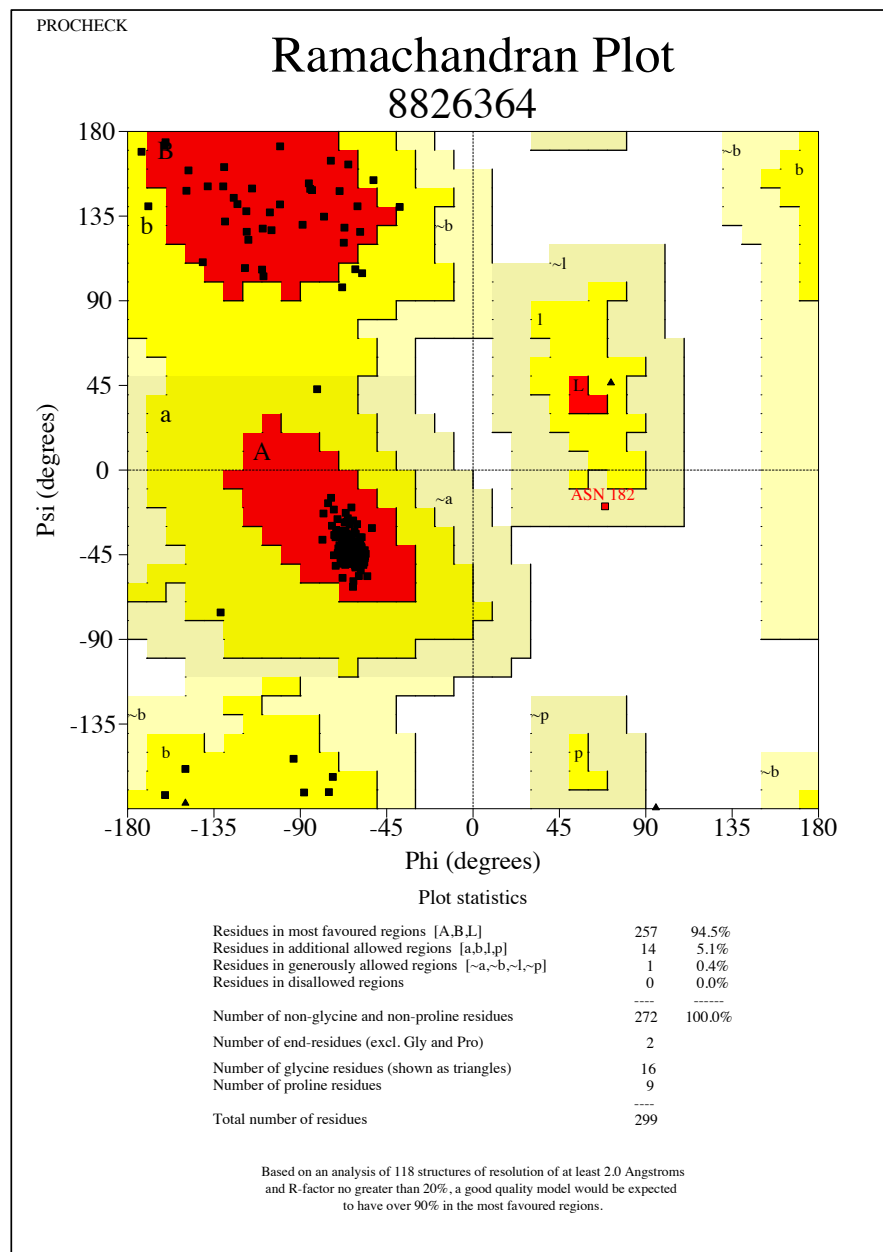

8826364\_01.ps

Figure S4. Ramachandran plot analyses of the Schgr-AKHR model from PROCHECK

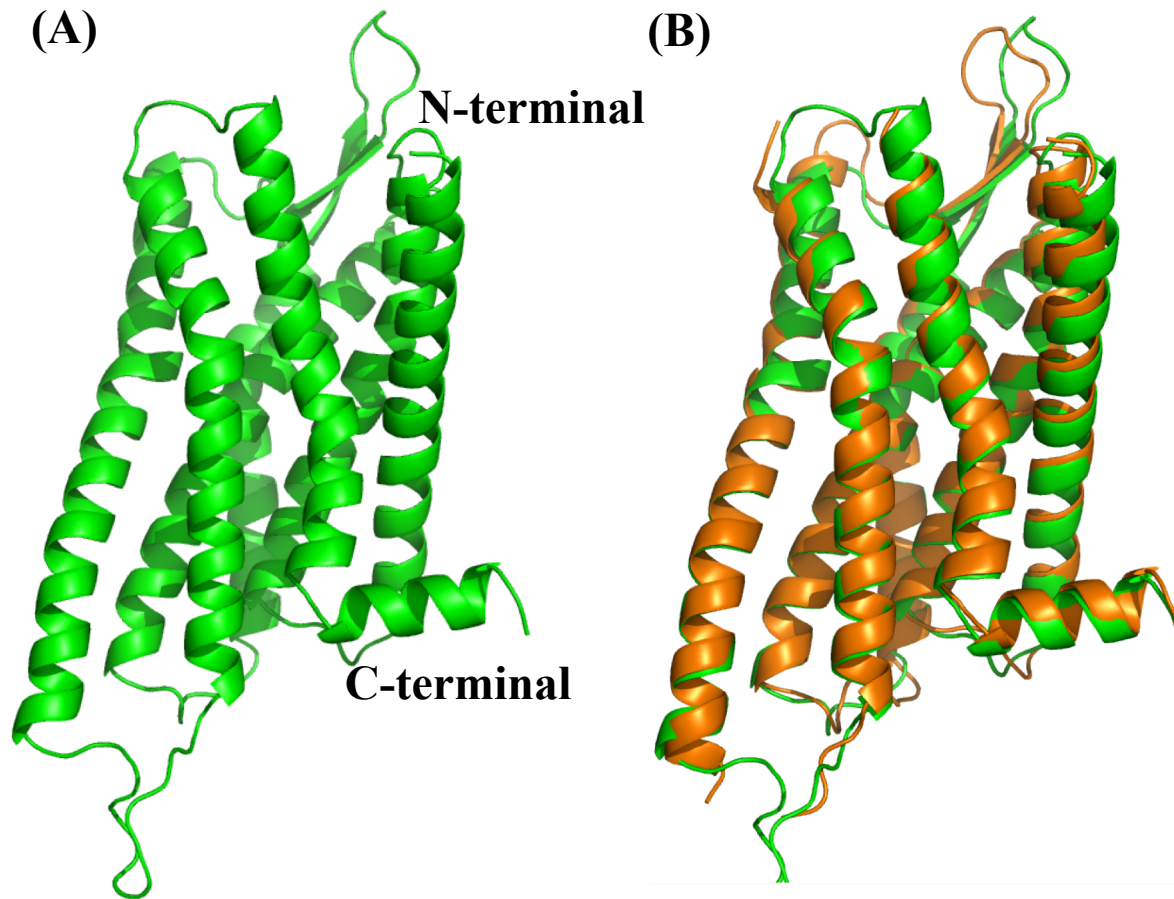

**Figure S5.** The final 3D structure of *Schistocerca gregaria* (A) and the comparison of *Schistocerca gregaria* model with template structure hκ-OR (orange color). Proteins are shown as ribbon diagram. The figures were made using PyMol (<http://pymol.org/>)
